# Supplementary material for: A brief history of tsunamis in the Vanuatu Arc
Source: Copernicus journal article supplement (doi:10.5194/nhess-24-3461-2024), 2024-10-09
Supplement: Supplementary file 1 [file nhess-24-3461-2024-supplement.zip]

## Sheet: Sheet1
Event's number	Time of the source having triggered a tsunami reported/recorded in Vanuatu	Tsunami source (E: earthquake; V: volcano)	Latitude (°)	Longitude (°)	Distance to Vanuatu center (km)	Type of eruption	Depth (km)	Magnitude (Mw)	Maximum reported vertical runup (m)	Zone of observation with maximum vertical runup	Amplitude LATA (m)	Arrival Time LATA	Amplitude VANU (m)	Arrival Time VANU	Amplitude LENA (m)	Arrival Time LENA	Amplitude LITZ (m)	Arrival Time LITZ	Amplitude LUGA (m)	Arrival Time LUGA	Max amplitude or run-up value (m)	USGS ID / volcano name	Date of update (earthquake sources only)	Location	References* (see bottom of the table)
1	2023-05-20T01:50:59.158Z	E	-23.0421	170.56	752.133		27.309	7.1			NaN	NaN	NaN	NaN	NaN	NaN	not ident	not ident	NaN	NaN	NaN	us6000kdce	2023-07-24T01:15:40.040Z	southeast of the Loyalty Islands
2	2023-05-19T02:57:03.172Z	E	-23.2063	170.742	775.692		18.053	7.7			NaN	NaN	NaN	NaN	0.7	not ident	0.07	2023-05-19 04:30:00	NaN	NaN	0.7	us6000kd0n	2023-07-24T01:16:07.040Z	southeast of the Loyalty Islands
3	2023-01-31 07:30:00Z	V	-16.7	168.4	21.7865	explosive/submarine					NaN	NaN	0.05	2021-01-31 19:26:00	nothing	nothing	NaN	NaN	0.04	2021-01-31 18:48:00	0.05	Epi B		East Epi Volcano, Vanuatu	15
4	2022-01-15 04:20:00Z	V	-20.536	-175.382	1784.07	explosive/submarine					NaN	NaN	1.03	2022-01-15 06:20:00	NaN	NaN	0.45	2022-01-15 06:12:00	0.58	2022-01-15 06:25:00	1.03	HTHH		Tonga
5	2021-11-16	V (?)	-14.281	167.514	274.858	explosive/aerial					NaN	NaN	nothing	nothing	NaN	NaN	<0.1	2021-11-16 05:34:00			0.1	numerous high freq events recorded - not sure about the source but Gaua erupted on this date until 15 December 2021		Vanuatu
6	2021-03-04 19:28:33.178Z	E	-29.7228	-177.279	2074.91		28.93	8.1			NaN	NaN	0.05	2021-03-04 22:53:00	0.38	Not Ident	0.06	2021-03-04 23:15:00	NaN	NaN	0.38	us7000dflf	2021-12-14T01:15:40.270Z	Kermadec Islands, New Zealand
7	2021-02-10 13:19:55.530Z	E	-23.0511	171.657	798.077		10	7.7			NaN	NaN	0.05	2021-02-10 14:28:00	1.4	2021-02-10 14:06:00	0.08	2021-02-10 15:09:00	0.09	2021-02-10 15:23:00	1.4	us6000dg77	2021-11-29T05:22:26.891Z	southeast of the Loyalty Islands	14
8	2020-03-14 10:01:17.118Z	E	-27.367	-175.61	2048.76		11	6.4			NaN	NaN	0.01	not ident	nothing	nothing	0.02	not ident	0.02	not ident	0.02	us60008fl8	2022-08-08T18:43:39.003Z	Kermadec Islands region
9	2019-06-15 22:55:04.130Z	E	-30.6441	-178.1	2087.58		46	7.3			NaN	NaN	0.05	Not Ident	0.04	2019-06-16 01:48:00	0.02	Not Ident	nothing	nothing	0.05	us6000417i	2019-09-06T14:25:11.040Z	Kermadec Islands, New Zealand
10	2018-12-05 04:18:08.420Z	E	-21.9496	169.427	602.746		10	7.5	4	Aneytium	0.04	2018-12-05 07:02:00	0.31	2018-12-05 04:59:00	0.72	2018-12-05 04:40:00	0.07	2018-12-05 06:06:00	0.1	2018-12-05 06:05:00	4	us1000i2gt	2022-05-03T19:50:49.454Z	166 km ESE of Tadine, New Caledonia	13
11	2018-08-29 03:51:56.100Z	E	-22.0295	170.126	630.995		21.43	7.1			NaN	NaN	0.1	2018-08-29 05:17:00	0.5	2018-08-29 04:24:00	0.02	2018-08-29 06:13:00	nothing	nothing	0.5	us1000gjaz	2022-08-08T07:34:14.777Z	238 km ESE of Tadine, New Caledonia
12	2017-11-19 22:43:29.250Z	E	-21.3246	168.672	521.614		10	7			NaN	NaN	0.06	2017-11-19 23:27:00	0.31	2017-11-19 23:06:00	0.02	not ident	not ident	not ident	0.31	us2000brlf	2022-05-03T19:44:28.459Z	85 km ENE of Tadine, New Caledonia
13	2017-11-19 15:09:02.880Z	E	-21.5027	168.598	540.701		13	6.6			NaN	NaN	not ident	not ident	0.12	2017-11-19 16:07:00	nothing	nothing	nothing	nothing	0.12	us2000brgk	2022-05-03T19:44:23.330Z	74 km E of Tadine, New Caledonia
14	2017-09-08 04:49:19.180Z	E	15.0222	-93.8993	11312.5		47.39	8.2			0.07	2017-11-19 20:34:00	0.14	2017-09-08 21:10:00	NaN	NaN	0.07	2017-09-08 20:57:00	0.05	2017-09-08 21:27:00	0.14	us2000ahv0	2023-03-17T00:17:02.841Z	near the coast of Chiapas, Mexico
15	2017-07-13 03:36:08.640Z	E	-4.7787	153.211	2103.75		34	6.4			NaN	NaN	NaN	NaN	<0.05	2017-07-13 04:42:00	NaN	NaN	0.04	not ident	0.04	us20009vvi	2022-05-03T19:54:11.122Z	115 km ESE of Kokopo, Papua New Guinea
16	2017-01-03 21:52:30.670Z	E	-19.3733	176.052	884.204		12	6.9			nothing	nothing	nothing	nothing	0.07	2017-01-03 23:16:00	NaN	NaN	nothing	nothing	0.07	us10007pj6	2022-05-03T18:10:28.133Z	225 km SW of Nadi, Fiji
17	2016-12-08 17:38:46.280Z	E	-10.6812	161.327	997.46		40	7.8			0.12	2016-12-08 18:26:00	NaN	NaN	0.11	2016-12-08 19:31:00	0.25	2016-12-08 19:27:00	NaN	NaN	0.25	us20007z80	2022-05-03T18:56:20.197Z	69 km WSW of Kirakira, Solomon Islands
18	2016-08-12 01:26:36.280Z	E	-22.4765	173.117	827.551		16.37	7.2			nothing	nothing	nothing	nothing	0.21	2016-08-12 02:29:00	nothing	nothing	nothing	nothing	0.21	us10006d5h	2022-05-03T18:54:03.532Z	southeast of the Loyalty Islands
19	2016-04-03 08:23:52.320Z	E	-14.3235	166.855	297.42		26	6.9			nothing	nothing	0.03	2016-04-03 10:00:00	NaN	NaN	NaN	NaN	0.03	2016-04-03 11:15:00	0.03	us20005e8t	2022-08-02T16:45:39.948Z	82 km NNW of Port-Olry, Vanuatu
20	2015-09-16 22:54:32.860Z	E	-31.5729	-71.6744	11693.1		22.44	8.3			0.25	2015-09-17 16:11:00	0.23	2015-09-17 14:00:00	NaN	NaN	NaN	NaN	0.19	not ident	0.25	us20003k7a	2023-01-11T16:44:34.776Z	48 km W of Illapel, Chile
21	2015-05-07 07:10:19.590Z	E	-7.2175	154.557	1818.39		10	7.1			nothing	nothing	0.04	2015-05-07 10:55:00	NaN	NaN	NaN	NaN	0.03	2015-05-07 11:09:00	0.04	us20002das	2022-07-31T04:59:50.659Z	143 km SW of Panguna, Papua New Guinea
22	2015-05-05 01:44:06.380Z	E	-5.4624	151.875	2173.11		55	7.5			nothing	nothing	0.04	2015-05-05 05:25:00	NaN	NaN	NaN	NaN	0.09	2015-05-05 04:27:00	0.09	us20002bnf	2022-07-31T04:23:02.600Z	131 km SSW of Kokopo, Papua New Guinea
23	2014-04-19 13:28:00.810Z	E	-6.7547	155.024	1808.94		43.37	7.5			nothing	nothing	0.04	2014-04-19 18:06:00	NaN	NaN	NaN	NaN	0.04	2014-04-19 16:38:00	0.04	usb000pr89	2022-05-03T16:48:17.192Z	70 km SW of Panguna, Papua New Guinea
24	2014-04-12 20:14:39.300Z	E	-11.2701	162.148	887.131		22.56	7.6			nothing	nothing	0.05	2014-04-12 21:39:00	NaN	NaN	NaN	NaN	0.05	2014-04-12 21:36:00	0.05	usc000phx5	2022-05-03T16:47:44.748Z	93 km SSE of Kirakira, Solomon Islands
25	2014-04-13 12:36:19.230Z	E	-11.4633	162.051	880.403		39	7.4			NaN	NaN	0.05	2014-04-13 14:03:00	NaN	NaN	NaN	NaN	NaN	NaN	0.05	usc000piqj	2022-05-03T16:47:48.290Z	112 km S of Kirakira, Solomon Islands
26	2014-04-01 23:46:47.260Z	E	-19.6097	-70.7691	12429		25	8.2			0.05	2014-04-02 18:35:00	0.12	2014-04-02 17:36:00	NaN	NaN	NaN	NaN	0.07	2014-04-02 18:47:00	0.12	usc000nzvd	2022-12-26T02:21:00.248Z	93 km NW of Iquique, Chile
27	2013-09-30 05:55:55.220Z	E	-30.9255	-178.323	2095.01		41.54	6.5			nothing	nothing	0.03	not ident	NaN	NaN	NaN	NaN	0.07	not ident	0.07	usb000k2h2	2022-05-03T16:28:03.770Z	Kermadec Islands, New Zealand
28	2013-02-06 01:12:25.830Z	E	-10.799	165.114	732.741		24	8	11	West Nendo	0.89	2013-02-06 01:15:00	0.33	2013-02-06 02:24:00	NaN	NaN	NaN	NaN	NaN	NaN	11	usc000f1s0	2022-07-24T17:28:55.652Z	75 km W of Lata, Solomon Islands	12
29	2012-03-09 07:09:50.950Z	E	-19.125	169.613	312.56		16	6.7			nothing	nothing	0.08	2012-03-09 07:57:00	NaN	NaN	NaN	NaN	NaN	NaN	0.08	usp000jfzj	2022-05-03T15:35:04.014Z	57 km NE of Isangel, Vanuatu
30	2012-03-03 12:19:55.090Z	E	-22.141	170.34	650.147		14	6.6			nothing	nothing	0.04	2012-03-03 13:09:00	NaN	NaN	NaN	NaN	NaN	NaN	0.04	usp000jfqx	2022-05-03T15:34:58.055Z	262 km ESE of Tadine, New Caledonia
31	2012-02-02 13:34:40.650Z	E	-17.827	167.133	172.462		23	7.1			nothing	nothing	0.07	2012-02-02 13:45:00	NaN	NaN	NaN	NaN	NaN	NaN	0.07	usp000jeag	2022-05-03T15:33:15.191Z	125 km W of Port-Vila, Vanuatu
32	2012-01-09 04:07:14.670Z	E	-10.617	165.16	748.693		28	6.4			nothing	nothing	0.03	not ident	NaN	NaN	NaN	NaN	NaN	NaN	0.03	usp000jd8k	2022-05-03T16:35:42.625Z	70 km W of Lata, Solomon Islands
33	2011-08-20 16:55:02.810Z	E	-18.365	168.143	189.892		32	7.2			nothing	nothing	0.18	2011-08-20 17:06:00	NaN	NaN	NaN	NaN	NaN	NaN	0.18	usp000j6r4	2022-04-08T21:59:44.948Z	71 km SSW of Port-Vila, Vanuatu
34	2011-03-11 05:46:24.120Z	E	38.297	142.373	6685.73		29	9.1			1.37	2011-03-11 01:22:00	0.79	2011-03-11 14:39:00	NaN	NaN	NaN	NaN	NaN	NaN	1.37	official20110311054624120_30	2022-11-10T01:14:56.446Z	2011 Great Tohoku Earthquake, Japan
35	2011-01-13 16:16:41.540Z	E	-20.628	168.471	442.63		9	7			nothing	nothing	0.04	2011-01-13 17:30:00	NaN	NaN	NaN	NaN	NaN	NaN	0.04	usp000ht15	2022-07-19T02:16:12.012Z	118 km NNE of Tadine, New Caledonia
36	2011-01-09 10:03:43.990Z	E	-19.155	168.312	277.989		22	6.5			nothing	nothing	0.04	not ident - mix with EQ	NaN	NaN	NaN	NaN	NaN	NaN	0.04	usp000hst4	2022-07-19T02:08:49.807Z	110 km WNW of Isangel, Vanuatu
37	2010-12-25 13:16:37.000Z	E	-19.702	167.947	339.682		16	7.3			nothing	nothing	0.17	2010-12-25 13:40:00	NaN	NaN	NaN	NaN	NaN	NaN	0.17	usp000hrw0	2022-05-02T22:31:14.248Z	141 km W of Isangel, Vanuatu
38	2010-08-10 05:23:44.980Z	E	-17.541	168.069	99.0558		25	7.3			nothing	nothing	0.34	2010-08-10 05:28:00	NaN	NaN	NaN	NaN	NaN	NaN	0.34	usp000hhuc	2022-07-18T18:19:48.812Z	33 km NW of Port-Vila, Vanuatu
39	2010-07-18 13:34:59.360Z	E	-5.931	150.59	2260.19		35	7.3			nothing	nothing	0.06	not ident	NaN	NaN	NaN	NaN	NaN	NaN	0.06	usp000hfku	2022-07-18T16:41:16.024Z	New Britain region, Papua New Guinea
40	2010-05-27 17:14:46.570Z	E	-13.698	166.643	369.715		31	7.2			NaN	NaN	0.04	2010-05-27 18:07:00	NaN	NaN	NaN	NaN	NaN	NaN	0.04	usp000hd84	2022-07-16T14:23:38.241Z	100 km WNW of Sola, Vanuatu
41	2010-02-27 06:34:11.530Z	E	-36.122	-72.898	11335.4		22.9	8.8			NaN	NaN	0.3	2010-02-27 22:09:00	NaN	NaN	NaN	NaN	NaN	NaN	0.3	official20100227063411530_30	2022-08-29T15:06:45.907Z	36 km WNW of Quirihue, Chile
	2009-10-07 22:18:51.240Z	E	-12.517	166.382	501.029		35	7.8			NaN	NaN	0.3	2009-10-07 23:01:00	NaN	NaN	NaN	NaN	NaN	NaN	0.3	usp000h2gd	2022-05-02T21:29:39.820Z	196 km NW of Sola, Vanuatu
42	2009-10-07 22:03:14.470Z	E	-13.006	166.51	445.54		45	7.7			NaN	NaN										usp000h2g9	2022-07-15T18:45:47.803Z	148 km NW of Sola, Vanuatu
43	2009-09-29 17:48:10.990Z	E	-15.489	-172.095	2110.92		18	8.1			NaN	NaN	0.19	2009-09-29 21:49:00	NaN	NaN	NaN	NaN	NaN	NaN	0.19	usp000h1ys	2022-07-15T18:20:44.470Z	168 km SSW of Matavai, Samoa
44	2009-07-15 09:22:29.030Z	E	-45.762	166.562	3243.13		12	7.8			NaN	NaN	0.06	2009-07-15 14:30:00	NaN	NaN	NaN	NaN	NaN	NaN	0.06	usp000gz8j	2022-07-15T13:59:45.046Z	97 km WSW of Te Anau, New Zealand
45	2009-06-23 14:19:22.350Z	E	-5.157	153.782	2028.19		64	6.7			NaN	NaN	0.05	not ident	NaN	NaN	NaN	NaN	NaN	NaN	0.05	usp000gyhq	2022-07-15T12:18:57.241Z	190 km ESE of Kokopo, Papua New Guinea
46	2009-03-19 18:17:40.470Z	E	-23.043	-174.66	1928.21		31	7.6			NaN	NaN	0.07	2009-03-19 21:57:00	NaN	NaN	NaN	NaN	NaN	NaN	0.07	usp000gv5p	2022-07-15T06:13:32.074Z	191 km S of Ohonua, Tonga
47	2009-01-15 07:27:20.290Z	E	-22.352	170.635	683.137		27	6.7			NaN	NaN	0.03	2009-01-15 08:56:00	NaN	NaN	NaN	NaN	NaN	NaN	0.03	usp000gsm5	2022-05-02T21:28:29.599Z	298 km ESE of Tadine, New Caledonia
48	2009-01-03 19:43:50.650Z	E	-0.414	132.885	4273.64		17	7.7			NaN	NaN	0.04	not ident	NaN	NaN	NaN	NaN	NaN	NaN	0.04	usp000gs2d	2022-07-15T03:38:55.850Z	140 km WNW of Manokwari, Indonesia
49	2008-04-09 12:46:12.720Z	E	-20.071	168.892	386.674		33	7.3			NaN	NaN	0.13	2008-04-09 13:10:00	NaN	NaN	NaN	NaN	NaN	NaN	0.13	usp000g3eq	2022-05-02T20:30:37.983Z	71 km SW of Isangel, Vanuatu
50	2007-11-14T15:40:50.530Z	E	-22.247	-69.89	12368.4		40	7.7			NaN	NaN	0.03	not ident	NaN	NaN	NaN	NaN	NaN	NaN	0.03	usp000fshy	2023-04-20T20:26:53.990Z	36 km ESE of Tocopilla, Chile
51	2007-09-02T01:05:18.150Z	E	-11.61	165.762	620.662		35	7.2			NaN	NaN	0.05	not ident	NaN	NaN	NaN	NaN	NaN	NaN	0.05	usp000fm6b	2022-05-02T20:33:09.345Z	97 km S of Lata, Solomon Islands
52	2007-08-15T23:40:57.890Z	E	-13.386	-76.603	12166.2		39	8			NaN	NaN	0.12	2007-08-16 17:18:00	NaN	NaN	NaN	NaN	NaN	NaN	0.12	usp000fjta	2022-09-19T18:59:17.671Z	41 km SW of San Vicente de CaÃ±ete, Peru
53	2007-04-01T20:39:58.710Z	E	-8.466	157.043	1516.04		24	8.1			NaN	NaN	0.14	2007-04-01 05:30:00	NaN	NaN	NaN	NaN	NaN	NaN	0.14	usp000f83m	2022-07-14T07:01:32.418Z	45 km SSE of Gizo, Solomon Islands
54	2007-03-25T00:40:01.610Z	E	-20.617	169.357	457.066		34	7.1			NaN	NaN	0.07	2007-03-25 01:12:00	NaN	NaN	NaN	NaN	NaN	NaN	0.07	usp000f7b4	2022-07-14T07:13:27.595Z	119 km S of Isangel, Vanuatu
55	2007-01-13T04:23:21.160Z	E	46.243	154.524	7136.05		10	8.1			NaN	NaN	0.04	not ident	NaN	NaN	NaN	NaN	NaN	NaN	0.04	usp000f2ab	2022-07-14T08:15:53.956Z	east of the Kuril Islands
56	2006-11-15T11:14:13.570Z	E	46.592	153.266	7198.88		10	8.3			NaN	NaN	0.15	2006-11-15 11:14:00	NaN	NaN	NaN	NaN	NaN	NaN	0.15	usp000exfn	2022-09-24T08:33:38.884Z	Kuril Islands
57	2006-05-03T15:26:40.290Z	E	-20.187	-174.123	1906.62		55	8			NaN	NaN	0.21	2006-05-03 21:42:00	NaN	NaN	NaN	NaN	NaN	NaN	0.21	usp000eg5g	2022-07-14T11:33:02.464Z	47 km SSE of Pangai, Tonga
58	2004-12-26T00:58:53.450Z	E	3.295	95.982	8237.62		30	9.1			NaN	NaN	0.11	2004-12-26 22:30:00	NaN	NaN	NaN	NaN	NaN	NaN	0.11	official20041226005853450_30	2023-01-03T22:32:42.708Z	2004 Sumatra - Andaman Islands Earthquake
59	2004-12-23T14:59:04.410Z	E	-49.312	161.345	3687.17		10	8.1			NaN	NaN	0.03	not ident	NaN	NaN	NaN	NaN	NaN	NaN	0.03	usp000db93	2022-05-02T17:38:24.182Z	north of Macquarie Island
60	2004-01-03T16:23:21.020Z	E	-22.253	169.683	641.739		22	7.1			NaN	NaN	0.07	2004-01-03 17:24:00	NaN	NaN	NaN	NaN	NaN	NaN	0.07	usp000cgz9	2022-05-02T16:58:31.257Z	202 km ESE of Tadine, New Caledonia
61	2002-01-02T17:22:48.760Z	E	-17.6	167.856	110.852		21	7.2	1.4	Port Vila (Efate)	NaN	NaN	0.32	2002-01-02 17:18:00	NaN	NaN	NaN	NaN	NaN	NaN	1.4	usp000avpw	2022-05-02T15:40:10.561Z	50 km WNW of Port-Vila, Vanuatu	10
62	2001-06-23T20:33:14.130Z	E	-16.265	-73.641	12324.5		33	8.4			NaN	NaN	0.16	2001-06-24 14:36:00	NaN	NaN	NaN	NaN	NaN	NaN	0.16	official20010623203314130_33	2022-04-29T19:23:29.022Z	6 km SSW of Atico, Peru
63	2000-11-16T04:54:56.740Z	E	-3.98	152.169	2249.48		33	8			NaN	NaN	0.06	non ident	NaN	NaN	NaN	NaN	NaN	NaN	0.06	usp000a3qq	2022-04-29T19:26:13.204Z	24 km N of Rabaul, Papua New Guinea
64	1999-11-26T13:21:15.570Z	E	-16.423	168.214	26.4244		33	7.5	7	South Pentecost, East Ambrym	NaN	NaN	0.32	1999-11-26 14:00:00	NaN	NaN	NaN	NaN	NaN	NaN	7	usp0009j4n	2022-04-29T18:12:31.498Z	92 km ESE of Lakatoro, Vanuatu	8, 9
65	1998-03-25T03:12:25.070Z	E	-62.877	149.527	5344.87		10	8.1			NaN	NaN	0.04	1998-03-25 12:00:00	NaN	NaN	NaN	NaN	NaN	NaN	0.04	usp0008hzd	2022-04-29T17:21:43.239Z	Balleny Islands region
66	1997-12-05T11:26:54.690Z	E	54.841	162.035	7980.73		33	7.8			NaN	NaN	0.04	non ident	NaN	NaN	NaN	NaN	NaN	NaN	0.04	usp0008btk	2022-04-29T17:10:27.685Z	156 km S of Ustâ€™-Kamchatsk Staryy, Russia
67	1997-04-21T12:02:26.430Z	E	-12.584	166.676	482.495		33	7.7	3	East Hiu (Torres)	NaN	NaN	0.22	1997-04-21 13:00:00	NaN	NaN	NaN	NaN	NaN	NaN	3	usp00080wt	2022-04-29T16:50:31.202Z	171 km NNW of Sola, Vanuatu	7
68	1996-11-12T16:59:44.030Z	E	-14.993	-75.675	12185.9		33	7.7			NaN	NaN	0.05	1996-11-13 10:36:00	NaN	NaN	NaN	NaN	NaN	NaN	0.05	usp0007swp	2022-04-29T20:39:17.369Z	60 km SW of Changuillo, Peru
69	1996-06-10T04:03:35.480Z	E	51.564	-177.632	7718.44		33	7.9			NaN	NaN	0.06	1996-06-10 15:06:00	NaN	NaN	NaN	NaN	NaN	NaN	0.06	usp0007jcu	2022-04-29T20:21:13.313Z	77 km WSW of Adak, Alaska
70	1995-12-03T18:01:08.990Z	E	44.663	149.3	7090.45		33	7.9			NaN	NaN	0.05	1995-12-04 04:30:00	NaN	NaN	NaN	NaN	NaN	NaN	0.05	usp000782n	2022-04-29T19:48:23.748Z	128 km ESE of Kurilâ€™sk, Russia
71	1995-10-09T15:35:53.910Z	E	19.055	-104.205	10373.3		33	8			NaN	NaN	0.07	1995-10-10 05:54:00	NaN	NaN	NaN	NaN	NaN	NaN	0.07	usp00074vc	2022-04-29T19:55:12.788Z	5 km E of El Colomo, Mexico
72	1995-08-16T10:27:28.630Z	E	-5.799	154.178	1948.69		30.1	7.7			NaN	NaN	0.07	1995-08-16 15:00:00	NaN	NaN	NaN	NaN	NaN	NaN	0.07	usp00071w4	2022-04-29T19:58:30.281Z	155 km WNW of Panguna, Papua New Guinea
73	1995-07-30T05:11:23.630Z	E	-23.34	-70.294	12272.6		45.6	8			NaN	NaN	0.15	1995-07-30 22:30:00	NaN	NaN	NaN	NaN	NaN	NaN	0.15	usp000714t	2022-04-29T20:18:16.400Z	36 km NNE of Antofagasta, Chile
74	1995-05-16T20:12:44.220Z	E	-23.008	169.9	728.687		20.2	7.7	8	Aneityum	NaN	NaN	0.15	1995-05-16 21:06:00	NaN	NaN	NaN	NaN	NaN	NaN	8	usp0006xg1	2022-04-29T17:01:08.502Z	249 km E of Vao, New Caledonia	6
75	1995-04-07T22:06:56.890Z	E	-15.199	-173.529	1961.83		21.2	7.4			NaN	NaN	0.04	not ident	NaN	NaN	NaN	NaN	NaN	NaN	0.04	usp0006vb3	2022-04-29T17:21:39.778Z	88 km NNE of Hihifo, Tonga
76	1994-10-04T13:22:55.840Z	E	43.773	147.321	7055.67		14	8.3			NaN	NaN	0.19	1994-10-04 22:48:00	NaN	NaN	NaN	NaN	NaN	NaN	0.19	usp0006kdp	2022-04-28T17:22:14.274Z	48 km E of Shikotan, Russia
77	1994-07-13T02:35:56.020Z	E	-16.62	167.518	72.8751		33	7.2			NaN	NaN	0.08	1994-07-13 02:42:00	NaN	NaN	NaN	NaN	NaN	NaN	0.08	usp0006fjg	2022-04-28T17:36:55.494Z	58 km S of Lakatoro, Vanuatu
78	1994-02-12T17:58:23.990Z	E	-20.553	169.361	450.326		27.7	7			NaN	NaN	0.03	1994-02-21 18:24:00	NaN	NaN	NaN	NaN	NaN	NaN	0.03	usp00068eg	2022-04-28T17:49:29.808Z	112 km S of Isangel, Vanuatu
79	1980-07-17 19:42:23Z	E	-12.525	165.916			33	7.9		Port-Vila (Efate)											NaN			NW Torres
80	1980-07-08 23:19:19Z	E	-12.41	166.38			33	7.5		Port-Vila (Efate)											NaN			North Torres, SSW Vanikoro
81	1980-05-12 16:37:34	E	-14.464	167.902			20	6.1		Banks Islands											NaN			East of Mere Lava Island
82	1966-12-31 22:15:19Z	E	-12.326	166.491			35	7.1	0.8	Vanikoro											0.8			SW Vanikoro	1
83	1966-12-31 18:23:09Z	E	-12.091	166.552			55	7.8	2	Vanikoro											2			SW Vanikoro	1
84	1965-08-12 12:40:33Z	E	-16.022	166.97			25	7.4	2	West Santo											2			West of North Malekula	1, 5
85	1965-08-11 22:31:51Z	E	-15.861	167.092			30	7.6		North Malekula											NaN			North Malekula, South Santo	1, 5
86	1961-07-23 21:51:09Z	E	-18.307	168.29			25	7.3	1-1.5	Port Vila (Efate)											1.5			South Efate, NW Erromango	1, 2
87	1958-10-07 10	V	-16.7	168.4		Submarine	?	?		SE Epi											NaN	East Epi submarine volcanoes		East Epi submarine volcanoes	1
88	1950-12-02 19:51:51Z	E	-18.373	167.654			30	7.9		Erakor Island, Port Vila, Efate											NaN			SW Efate, NW Erromango	2
89	1933-11-19 03:11:25	E	-16.895	167.776			35	6.4		South Malekula											NaN			South Malekula	2
90	1901-08-08	V	-16.829	168.536																	NaN	Karua Volcano, Southeast Epi		Karua Volcano, Southeast Epi
91	1893-08-27	E	?	?			?	?		Port-Vila (Efate)											NaN			West Efate ?	1, 2
92	1892-08 First week 00:20	E	?	?			?	Large		Shark bay (Santo)											NaN			North Malekula- South Santo ?	1, 2
93	1883-10	E	?	?			?	?	2	SW Malekula											2			W Malekula ?	2
94	1878-02-11	E, V	-19.5	169.4		Eruptive	?	?		Port Resolution (Tanna)											NaN	Yasur Volcano, Tanna		Yasur Volcano, Tanna	1
95	1878-01-10 10:00	E, V	-19.5	169.4		Eruptive	?	Large	17	Port Resolution (Tanna)											17	Yasur Volcano, Tanna		Yasur Volcano, Tanna	1
96	1875-05-10	E	?	?			?	?		Erromango											NaN			?	1
97	1875-03-30 20:30	E	?	?			?	Large		Erromango, Aniwa											NaN			SW Tanna area	2
98	1875-03-29 21:00	E	?	?			?	?		Erromango											NaN			SW Tanna area	2
99	1875-03-28 23:00	E	-19.9	168.7			?	8.2 (Ref. 4)	4	Aneityum, Aniwa, Erromango											4			SW Tanna area	1, 2, 3, 4
100	1863-08-17 20:00	E, V	-19.5	169.4		Eruptive/aerial	?	Large		Erromango											NaN	Yasur Volcano, Tanna		Yasur Volcano, Tanna	1
	*References:
	Ref 1 - Soloviev et Go, 1974	Soloviev, S. L. and Go, C. N.: A catalogue of tsunamis on the western shore of the Pacific Ocean (173–1968) (Canadian Translation of Fisheries and Aquatic Sciences, 5077, 1984), Nauka Publishing House, Moscow, USSR, 310 pp., 1974.
	Ref 2 - Louat et Baldassari, 1989	Louat, R., Baldassari, C.: Chronologie des séismes et des tsunamis ressentis dans la région Vanuatu Nouvelle-Calédonie (1729-1989). ORSTOM, Nouméa, Nouvelle-Calédonie, Sciences de la Terre. Géologie Géophysique. Rapport Scientifique et Technique, N°1, 46 pp., 1989.
	Ref 3 - Sahal et al., 2010	Sahal, A., Pelletier, B., Chatelier, J., Lavigne, F., and Schindelé, F.: A catalog of tsunamis in New Caledonia from 28 March 1875 to 30 September 2009, Comptes Rendus Geoscience, 342, 434– 447, https://doi.org/10.1016/j.crte.2010.01.013, 2010.
	Ref 4 - Ioualalen et al., 2017	Ioualalen, M., Pelletier, B., and Solis Gordillo, G.: Investigating the March 28th 1875 and the September 20th 1920 earthquakes/ tsunamis of the Southern Vanuatu arc, offshore Loyalty Islands, New Caledonia, Tectonophysics, 709, 20–38, https://doi.org/10.1016/j.tecto.2017.05.006, 2017.
	Ref 5 - Benoit et Dubois, 1971	Benoit, M., and J. Dubois: The earthquake swarm in the New Hebrides archipelago, August 1965, Recent Crustal Movements, Roy. SOC. N. Z. Bull., 9, 141-148, 1971.
	Ref 6 - Lardy, 1995	Lardy M.: Quelques remarques à propos du séisme et tsunami du 17 mai 1995 à Port Vila. Note ORSTOM Port-Vila du 29 mai 1995, 1995.
	Ref 7 - Kaverina et al., 1998	Kaverina, A., Dreger, D., Antolik, M.: Source process of the 21 April, 1997 Santa Cruz Island earthquake (Mw 7.8). Geophys Res .Lett., 25 (21), 4027-4030, https://doi.org/10.1029/1998GL900017, 1998.
	Ref 8 - Pelletier et al., 2000	Pelletier B., Regnier M., Calmant S., Pillet R., Cabioch G., Lagabrielle Y., Bore J.-M., Caminade J.-P., Cristopher I. et Temakon S. : Le séisme d’Ambrym-Pentecôte (Vanuatu) du 26 novembre 1999: données préliminaires sur la séismicité, le tsunami et les déplacements associés. C. R. Acad. Sci. Paris, Science de la terre et des planètes, 331, 21-28 https://doi.org/10.1016/S1251-8050(00)01382-3, 200…
	Ref 9 - Ioualalen et al., 2006	Ioualalen, M., Pelletier, B., Watts, P., Regnier, M.: Numerical modeling of the 26 November 1999 Vanuatu tsunami. Journal of Geophysical Research, Oceans, 111, C6, https://doi.org/10.1029/2005JC003249, 2006.
	Ref 10 - Tendrayen, 2006	Tendrayen M., 2006 – Modélisation numérique du tsunami du 2 janvier 2002 au Vanuatu. Rapport de stage d’ingénieur ENSIM. 63 p.
	Ref 11 - Roger et al., 2019	Roger, J., Pelletier, B., and Aucan, J.: Update of the tsunami catalogue of New Caledonia using a decision table based on seismic data and marigraphic records, Nat. Hazards Earth Syst. Sci., 19, 1471–1483, https://doi.org/10.5194/nhess-19-1471-2019, 2019.
	Ref 12 - Fritz et al., 2013	Fritz H. M., Papantoniou A., Biukoto L., Albert G.: The Solomon Islands Tsunami of 6 February 2013 field survey in Santa Cruz Islands. American Geophysical Union, Fall Meeting 2013, NH41A-1696, 2013.
	Ref 13 - Roger et al., 2021	Roger, J., Pelletier, B., Duphil, M., Lefèvre, J., Aucan, J., Lebellegard, P., Thomas, B., Bachelier, C., and Varillon, D.: The Mw 7.5 Tadine (Maré, Loyalty Islands) earthquake and related tsunami of 5 December 2018: seismotectonic context and numerical modeling, Nat. Hazards Earth Syst. Sci., 21, 3489–3508, https://doi.org/10.5194/nhess-21-3489-2021, 2021.
	Ref 14 - Roger et al., 2023a	Roger J., Pelletier B., Gusman A., Power W., Wang X, Burbidge D., Duphil M.: Potential tsunami hazard of the southern Vanuatu subduction zone: tectonics, case study of the Matthew Island tsunami of 10 February 2021 and implication in regional hazard assessment. Nat. Hazards Earth Syst. Sci., 23, 393–414, https://doi.org/10.5194/nhess-23-393-2023, 2023a.
	Ref 15 - Roger et al., 2023b	Roger J., Ashraf, S., Pelletier, B., Krippner, J., Bani, P., Gusman, A.R., Thomas, B., Kali, J.-C.: The East-Epi Volcano submarine eruption and associated tsunami of 31 January 2023: a powerful event in the shadow of the HTHH eruption. American Geophysical Union, Fall Meeting 2023, 2023b.
