# Supplementary material for: A brief history of tsunamis in the Vanuatu Arc
Source: Copernicus journal article supplement (doi:10.5194/nhess-24-3461-2024), 2024-10-09
Supplement: Supplementary file 1 [file nhess-24-3461-2024-supplement.zip]

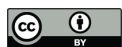

*Supplement of*

## **A brief history of tsunamis in the Vanuatu Arc**

**Jean H. M. Roger and Bernard Pelletier**

*Correspondence to:* Jean H. M. Roger ([j.roger@gns.cri.nz](mailto:j.roger@gns.cri.nz))

- [nhess-24-3461-2024-supplement-title-page.pdf](#)
- [Table S1.xlsx](#)

The copyright of individual parts of the supplement might differ from the article licence.
